# Supplementary material for: Genomic prediction of host resistance to sea lice in farmed Atlantic salmon populations
Source: PubMed Central journal article supplement (PMC4926294; doi:10.1186/s12711-016-0226-9), 2016-06-29

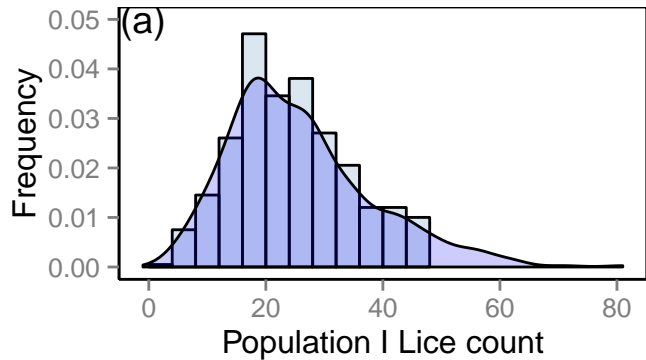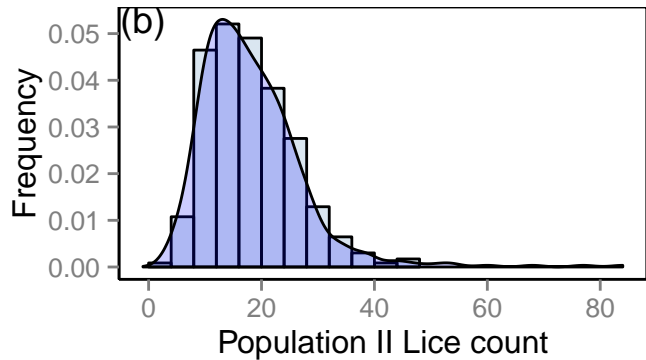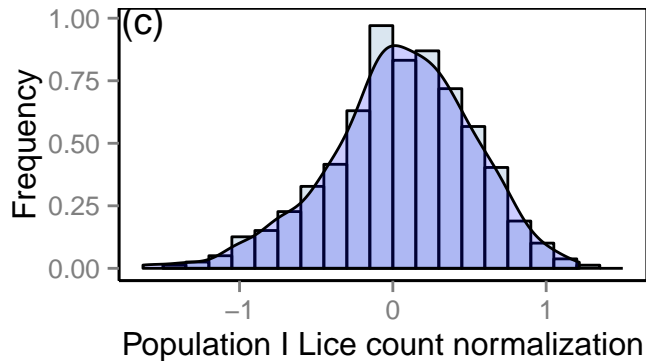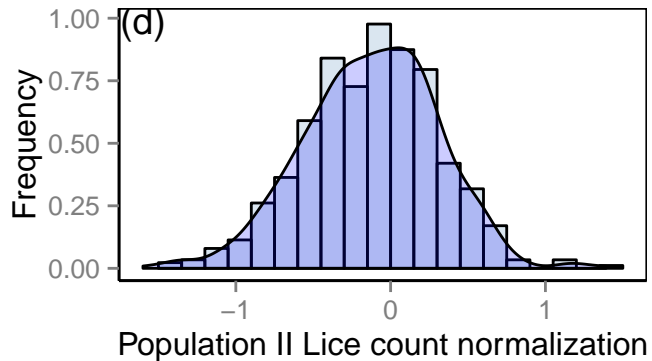

Supplement: 12711_2016_226_MOESM1_ESM.pdf [file 12711_2016_226_MOESM1_ESM.pdf]
