# Supplementary material for: Genomic prediction of host resistance to sea lice in farmed Atlantic salmon populations
Source: Springer Nature journal article supplement (doi:10.1186/s12711-016-0226-9), 2016-06-29

**Additional file 2.** The quantile-quantile (Q-Q) plot for the GWA analyses.

(A) Population I

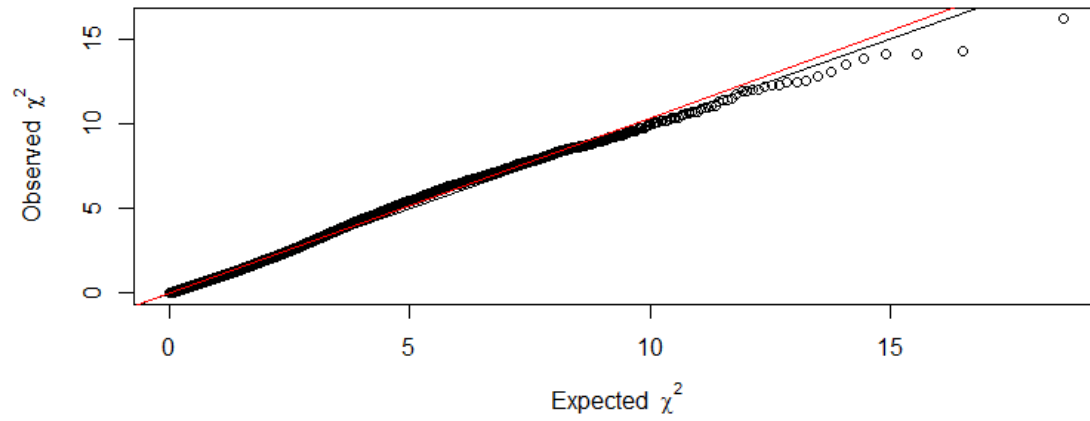

(B) Population II

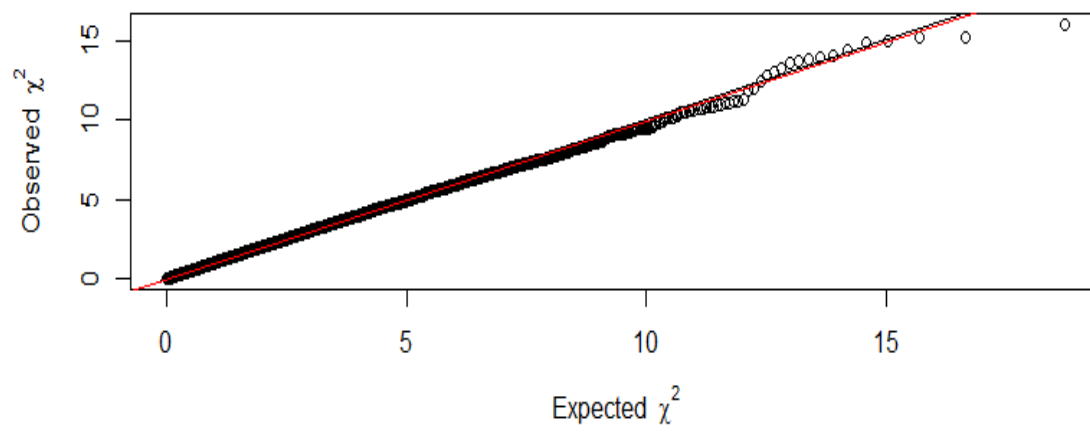

(C) Populations I and II combined

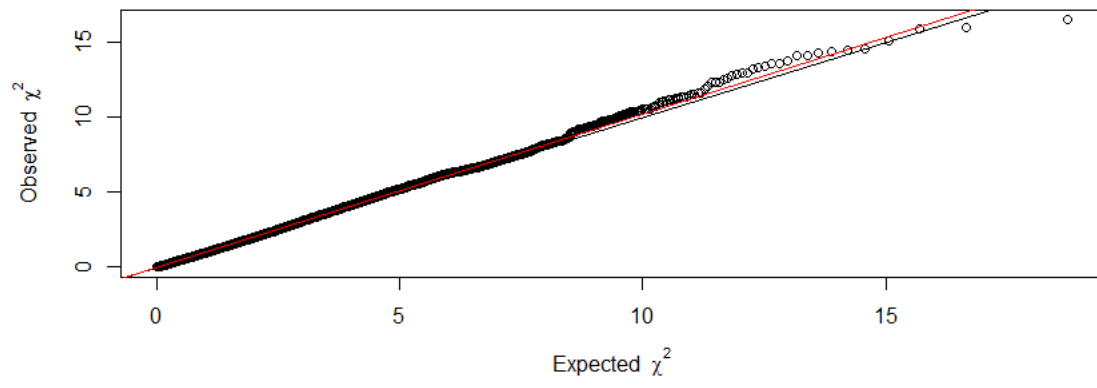

Supplement: MOESM2 [file 12711_2016_226_MOESM2_ESM.pdf]
